# Supplementary material for: Prognostic Impact of Left Atrial Appendage Patency After Device Closure
Source: PubMed Central journal article supplement — Circ Cardiovasc Interv. 2024 Apr 17;17(5):e013579. doi: 10.1161/CIRCINTERVENTIONS.123.013579 (PMC11097947; doi:10.1161/circinterventions.123.013579), 2024-04-17
Supplement: hcv-17-e013579-s001.pdf [file hcv-17-e013579-s001.pdf]

1 **Prognostic impact of left atrial appendage patency after device closure**

2

3 Short title: LAA patency and post-LAAC outcomes

4

5 Mu Chen<sup>†</sup>, MD, Peng-Cheng Yao<sup>†</sup>, MD, Zhen-Tao Fei, MD, Qun-Shan Wang, MD, Yi-Chi  
6 Yu, MD, Peng-Pai Zhang, MD, Wei Li, MD, Rui Zhang, MD, Bin-Feng Mo, MD, Ming-Zhe  
7 Zhao, MD, Yi Yu, MD, Mei Yang, MD, Yan Zhao, MD, Chang-Qi Gong, MD, Jian Sun<sup>\*</sup>, MD,  
8 Yi-Gang Li<sup>\*</sup>, MD

9

10 <sup>†</sup> These authors contribute equally to this work.

11

12 Department of Cardiology, Xinhua Hospital, School of Medicine, Shanghai Jiao Tong  
13 University, Shanghai, China

14

15 \*Correspondence: Yi-Gang Li, MD and Jian Sun, MD.

16 Department of Cardiology, Xinhua Hospital, School of Medicine, Shanghai Jiao Tong  
17 University

18 1665 Kongjiang Road, Shanghai 200092, China

19 Tel.: +86-21-25077265

20 E-mail: liyigang@xinquamed.com.cn; sunjian@xinquamed.com.cn

21

22

23

24

**SUPPLEMENTAL MATERIAL**

25 **Figure S1. Study flowchart.**

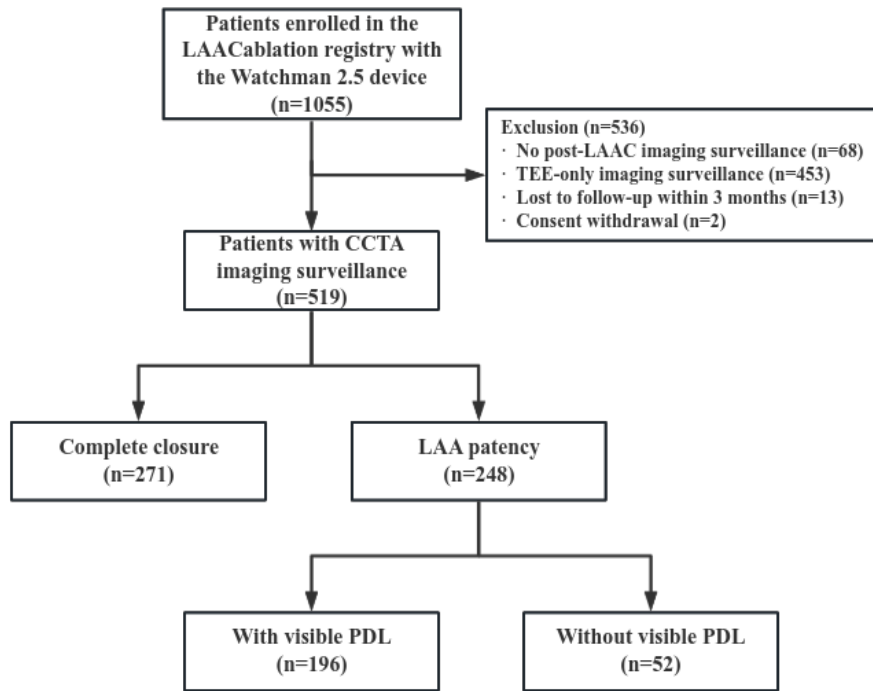

26  
27 CCTA=cardiac computed tomography angiography; LAA=left atrial appendage; LAAC=left  
28 atrial appendage closure; PDL=peri-device leak; TEE=transesophageal echocardiogram.

29 **Figure S2. Imaging of left atrial appendage before and after Watchman device**  
30 **implantation.**

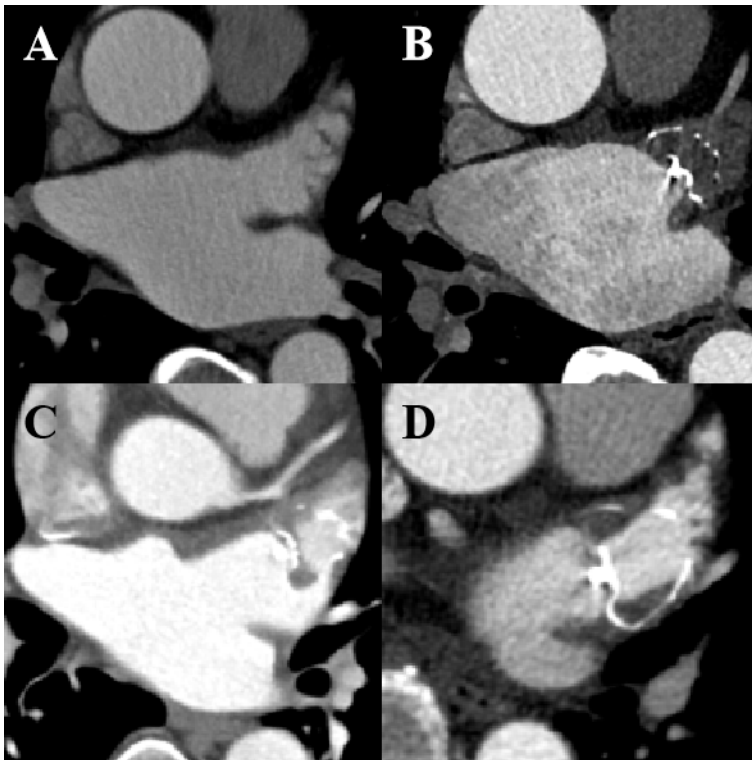

31  
32 The CCTA images show preoperative LAA (A), and postoperative LAA with complete closure  
33 (B), LAA patency with visible PDL (C) and LAA patency without visible PDL (or termed as  
34 IDE, D).  
35 CCTA=cardiac computed tomography angiography; IDE=incomplete device  
36 endothelialization; LAA=left atrial appendage.

37 **Figure S3. Impact of the PDL on stroke severity.**

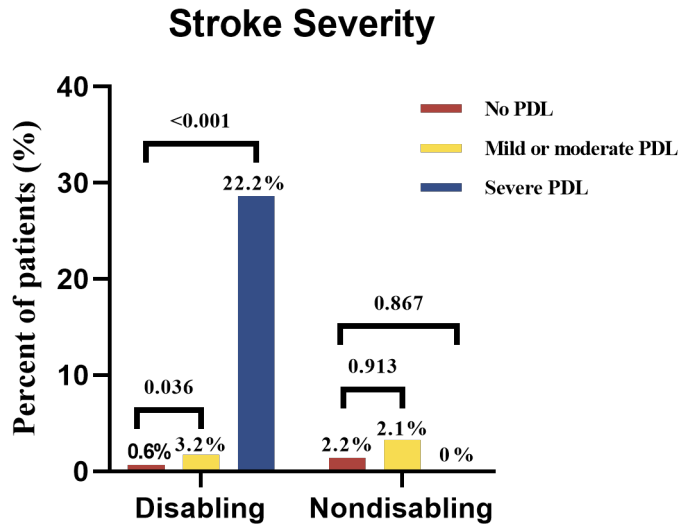

38

39 Impact of PDL severity (no PDL, mild or moderate PDL [ $\leq 5$ mm], or severe PDL [ $> 5$ mm]) on  
40 disabling or fatal (left panel) and nondisabling (right panel) strokes. Of note, no PDL includes  
41 complete closure and LAA patency without visible PDL.

42 LAA=left atrial appendage; PDL=peri-device leak.

1 **Figure S4. Patency severity and incidences of adverse events.**

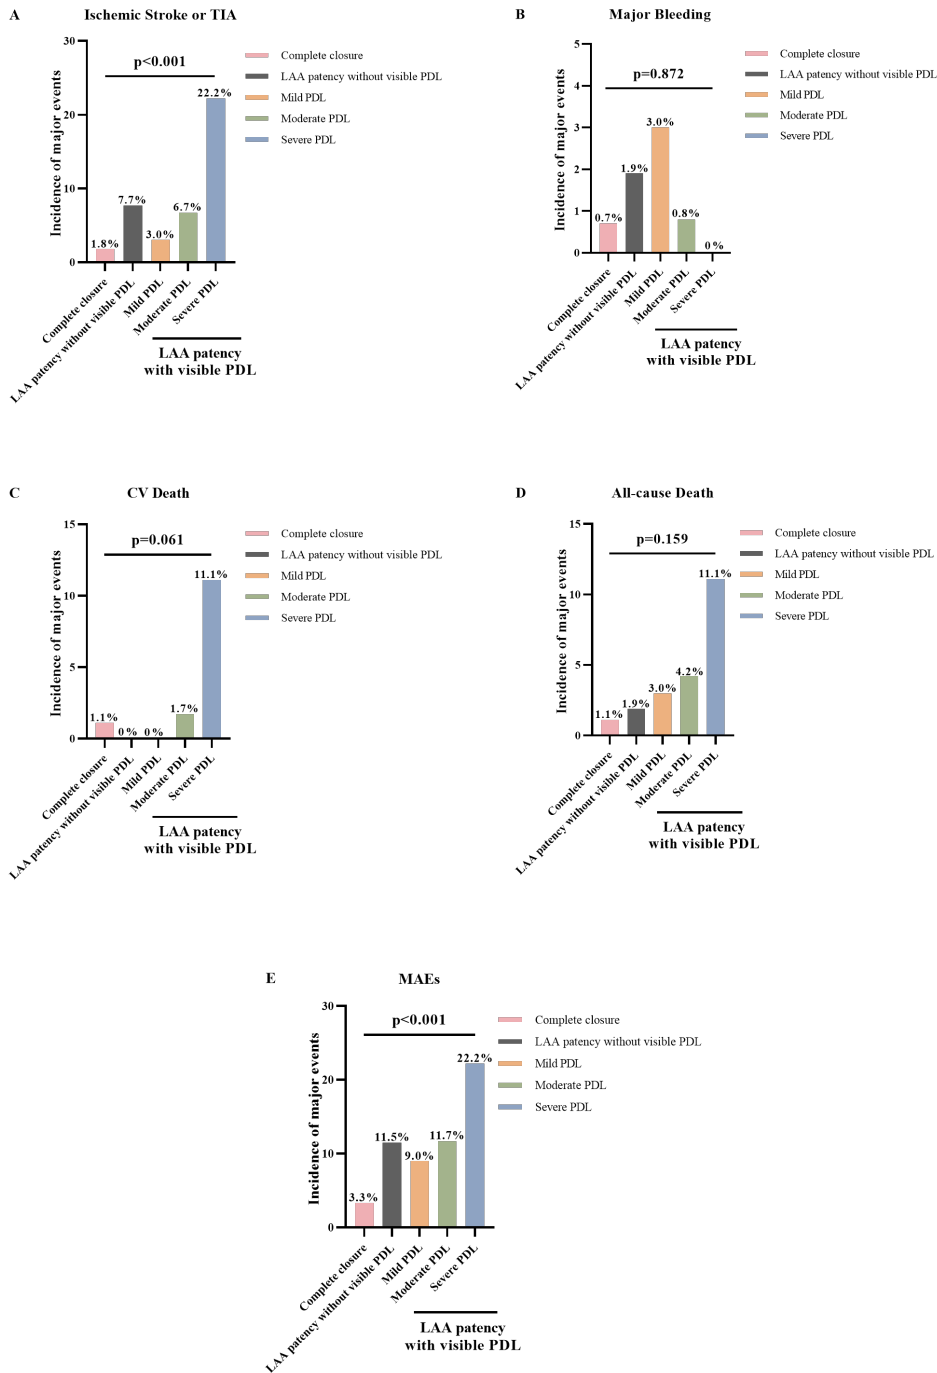

2  
 3 Patency severity (complete closure, LAA patency without visible PDL, mild PDL [ $>0-$   
 4  $\leq 3$ mm], moderate PDL [ $>3-\leq 5$ mm], or severe PDL [ $>5$ mm]) and incidence of adverse events  
 5 post-LAAC, including ischemic stroke or TIA (A), major bleeding (B), CV death (C), all-  
 6 cause death (D) and MAEs (E).

7 CV=cardiovascular; LAA=left atrial appendage; LAAC=left atrial appendage closure;  
 8 MAEs= major adverse events; PDL=peri-device leak; TIA=transient ischemic attack.

**Figure S5. Kaplan-Meier curve of recurrent atrial tachyarrhythmias.**

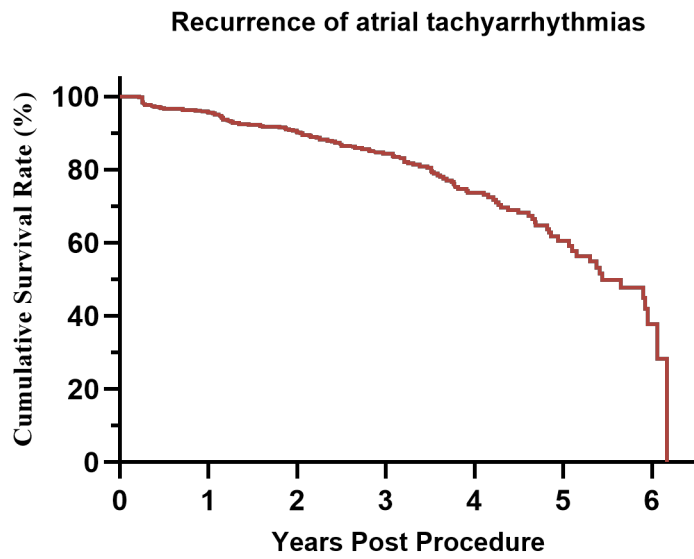

Note that patients underwent ablation prior to LAAC during the same procedure.

**Table S1. The inclusion and exclusion criteria for the LAACablation registry.**

| <b>Inclusion criteria</b>                                                                                      |
|----------------------------------------------------------------------------------------------------------------|
| 1) History of paroxysmal/persistent/longstanding persistent atrial fibrillation                                |
| 2) With contraindication of long-term anticoagulation, or unwilling to receive long-term anticoagulation       |
| 3) CHA <sub>2</sub> DS <sub>2</sub> -VASc score $\geq 2$ and/or HAS-BLED score $\geq 3$                        |
| 4) Undergo the combined procedure of catheter ablation and left atrial appendage closure                       |
| 5) With informed consent to participate in the study                                                           |
| 6) Age between 18 and 90 years                                                                                 |
| <b>Exclusion Criteria</b>                                                                                      |
| 1) Myocardial infarction within 3 months                                                                       |
| 2) Stroke or systemic embolism within 3 months                                                                 |
| 3) With a plan to receive heart transplantation                                                                |
| 4) Life expectancy less than 1 year                                                                            |
| 5) Severe bleeding diseases that cannot be treated with short-term anticoagulants                              |
| 6) With left atrial or left atrial appendage thrombus                                                          |
| 7) With uncontrolled malignant tumors                                                                          |
| 8) Obvious liver and kidney dysfunction (ALT, AST more than 2 times of the upper limit of normal, or CCr <50%) |
| 9) Women who are pregnant or breastfeeding                                                                     |
| 10) Other conditions not suitable to receive the procedure evaluated by the operators                          |

ALT=alanine transaminase; AST=aspartate aminotransferase; CCr=creatinine clearance normalized 1.73 m<sup>2</sup> body surface area.

**Table S2. Baseline characteristics of complete closure, LAA patency with and without visible PDL groups.**

| Characteristics                              | Complete closure<br>(n=271) | LAA patency with<br>visible PDL<br>(n=196) | LAA patency without<br>visible PDL<br>(n=52) | P value |
|----------------------------------------------|-----------------------------|--------------------------------------------|----------------------------------------------|---------|
| Age (years)                                  | 69.7 ± 7.7                  | 70.9 ± 7.8                                 | 71.9 ± 8.2                                   | 0.099   |
| Male                                         | 145 (53.5)                  | 102 (52.0)                                 | 28 (53.8)                                    | 0.944   |
| Paroxysmal AF                                | 126 (46.5)                  | 87 (44.4)                                  | 25 (48.1)                                    | 0.853   |
| Hypertension                                 | 200 (73.8)                  | 152 (77.6)                                 | 42 (80.8)                                    | 0.445   |
| Diabetes                                     | 62 (22.9)                   | 55 (28.1)                                  | 14 (26.9)                                    | 0.426   |
| Coronary artery disease                      | 117 (43.2)                  | 87 (44.4)                                  | 30 (57.7)                                    | 0.151   |
| History of stroke/TIA                        | 63 (23.2)                   | 47 (24.0)                                  | 17 (32.7)                                    | 0.342   |
| Heart Failure                                | 138 (50.9)                  | 104 (53.1)                                 | 22 (42.3)                                    | 0.386   |
| CHA <sub>2</sub> DS <sub>2</sub> -VASc score | 3.6 ± 1.4                   | 3.9 ± 1.7                                  | 3.8 ± 1.6                                    | 0.194   |
| HAS-BLED score                               | 2.1 ± 0.9                   | 2.0 ± 1.0                                  | 2.1 ± 0.8                                    | 0.268   |
| NT-proBNP (pg/mL)                            | 523.4 [163.1, 1057.7]       | 655.4 [201.6, 1299.5]                      | 653.7 [297.4, 1286.0]                        | 0.688   |
| LAD (mm)                                     | 42.5 ± 6.4                  | 42.5 ± 5.8                                 | 43.6 ± 4.9                                   | 0.484   |
| LVEF (%)                                     | 62.5 ± 7.3                  | 62.3 ± 6.7                                 | 61.2 ± 11.0                                  | 0.520   |
| Device sizes (mm)                            |                             |                                            |                                              |         |
| 21                                           | 27 (10.0)                   | 15 (7.7)                                   | 3 (5.8)                                      |         |
| 24                                           | 56 (20.7)                   | 44 (22.4)                                  | 7 (13.5)                                     |         |
| 27                                           | 73 (26.9)                   | 51 (26.0)                                  | 17 (32.7)                                    | 0.271   |
| 30                                           | 66 (24.4)                   | 46 (23.5)                                  | 11 (21.2)                                    |         |
| 33                                           | 49 (18.1)                   | 40 (20.4)                                  | 14 (26.9)                                    |         |
| Lesion sets of catheter ablation             |                             |                                            |                                              |         |
| Pulmonary vein isolation only                | 83 (30.7)                   | 62 (31.6)                                  | 17 (32.7)                                    | 0.945   |
| Left atrial roof line                        | 100 (37.0)                  | 75 (38.3)                                  | 23 (44.2)                                    | 0.639   |
| Left atrial posterior and/or inferior lines  | 56 (20.7)                   | 34 (17.3)                                  | 10 (19.2)                                    | 0.669   |
| Posterior wall isolation                     | 19 (7.0)                    | 12 (6.1)                                   | 2 (3.8)                                      | 0.683   |
| Anterior septal line                         | 93 (34.4)                   | 63 (32.1)                                  | 17 (32.7)                                    | 0.840   |
| Mitral isthmus line                          | 78 (28.9)                   | 46 (23.5)                                  | 11 (21.2)                                    | 0.305   |



|                                               |            |           |           |       |
|-----------------------------------------------|------------|-----------|-----------|-------|
| CS and great vein musculature ablation        | 37 (13.7)  | 16 (8.2)  | 7 (13.5)  | 0.169 |
| Vein of Marshall ethanol infusion             | 23 (8.5)   | 17 (7.7)  | 0 (0.0)   | 0.096 |
| Left atrial appendage electrical isolation    | 10 (3.7)   | 3 (1.5)   | 1 (1.9)   | 0.341 |
| Cavo-tricuspid line                           | 109 (40.4) | 63 (32.1) | 20 (38.5) | 0.198 |
| Superior vena cava isolation                  | 33 (12.2)  | 18 (9.2)  | 8 (15.4)  | 0.380 |
| CFAE ablation                                 | 23 (8.5)   | 14 (7.1)  | 5 (9.6)   | 0.796 |
| Intracardiac cardioversion                    | 73 (27.0)  | 55 (28.1) | 12 (23.1) | 0.772 |
| Discontinued antiplatelet therapy at 6 months | 64 (23.6)  | 50 (25.5) | 10 (19.2) | 0.633 |

Values are mean  $\pm$  SD, median [25<sup>th</sup>, 75<sup>th</sup> quartiles] or n (%).

AF=atrial fibrillation; CFAE=Complex fractionated atrial electrograms; CS=coronary sinus; LAA=left atrial appendage; LAD=left atrial diameter; LVEF=left ventricular ejection fraction; PDL=peri-device leak; TIA=transient ischemic attack.

**Table S3. Antithrombotic therapy at each time point.**

| Number of patients/groups |                     | Complete closure | LAA patency with visible PDL | LAA patency without visible PDL |
|---------------------------|---------------------|------------------|------------------------------|---------------------------------|
| 6-month<br>post-LAAC      | Patient number      | 271              | 196                          | 52                              |
|                           | No therapy          | 42 (15.5)        | 39 (19.9)                    | 3 (5.8)                         |
|                           | Single antiplatelet | 198 (73.1)       | 96 (49.0)                    | 41 (78.8)                       |
|                           | Dual antiplatelet   | 26 (9.6)         | 51 (26.0)                    | 6 (11.5)                        |
|                           | Oral anticoagulant  | 5 (1.8)          | 10 (5.1)                     | 2 (3.8)                         |
| 12-month<br>post-LAAC     | Patient number      | 265              | 171                          | 49                              |
|                           | No therapy          | 45 (17.0)        | 49 (28.7)                    | 2 (4.1)                         |
|                           | Single antiplatelet | 211 (79.6)       | 100 (58.5)                   | 42 (85.7)                       |
|                           | Dual antiplatelet   | 7 (2.6)          | 20 (11.7)                    | 5 (10.2)                        |
|                           | Oral anticoagulant  | 2 (0.8)          | 2 (1.2)                      | 0 (0.0)                         |
| 24-month<br>post-LAAC     | Patient number      | 225              | 155                          | 41                              |
|                           | No therapy          | 50 (22.2)        | 49 (31.6)                    | 5 (12.2)                        |
|                           | Single antiplatelet | 169 (75.1)       | 91 (58.7)                    | 36 (87.8)                       |
|                           | Dual antiplatelet   | 4 (1.8)          | 15 (9.7)                     | 0 (0.0)                         |
|                           | Oral anticoagulant  | 2 (0.9)          | 0 (0.0)                      | 0 (0.0)                         |
| 36-month<br>post-LAAC     | Patient number      | 158              | 103                          | 32                              |
|                           | No therapy          | 50 (31.6)        | 36 (35.0)                    | 5 (15.6)                        |
|                           | Single antiplatelet | 104 (65.8)       | 61 (59.2)                    | 27 (84.4)                       |
|                           | Dual antiplatelet   | 3 (1.9)          | 6 (5.8)                      | 0 (0.0)                         |
|                           | Oral anticoagulant  | 1 (0.6)          | 0 (0.0)                      | 0 (0.0)                         |
| 48-month<br>post-LAAC     | Patient number      | 84               | 58                           | 18                              |
|                           | No therapy          | 36 (42.9)        | 25 (43.1)                    | 3 (16.7)                        |
|                           | Single antiplatelet | 48 (47.1)        | 29 (50.0)                    | 5 (83.3)                        |
|                           | Dual antiplatelet   | 0 (0.0)          | 4(6.9)                       | 0 (0.0)                         |
|                           | Oral anticoagulant  | 0 (0.0)          | 0 (0.0)                      | 0 (0.0)                         |
| 60-month<br>post-LAAC     | Patient number      | 39               | 19                           | 7                               |
|                           | No therapy          | 27 (69.2)        | 9 (47.4)                     | 2 (28.6)                        |

|                       |                     |           |           |          |
|-----------------------|---------------------|-----------|-----------|----------|
|                       | Single antiplatelet | 12 (30.8) | 7 (36.8)  | 5 (71.4) |
|                       | Dual antiplatelet   | 0 (0.0)   | 3 (15.8)  | 0 (0.0)  |
|                       | Oral anticoagulant  | 0 (0.0)   | 0 (0.0)   | 0 (0.0)  |
|                       | Patient number      | 6         | 1         | 0        |
| 72-month<br>post-LAAC | No therapy          | 4 (66.7)  | 0 (0.0)   | -        |
|                       | Single antiplatelet | 2 (33.3)  | 1 (100.0) | -        |
|                       | Dual antiplatelet   | 0 (0.0)   | 0 (0.0)   | -        |
|                       | Oral anticoagulant  | 0 (0.0)   | 0 (0.0)   | -        |

Values are presented as n (%).

LAA=left atrial appendage; LAAC=left atrial appendage closure; PDL=peri-device leak.

**Table S4. Baseline characteristics among groups with different PDL severity.**

| Characteristics                              | No PDL (n=323)*       | Mild PDL (n=67)       | Moderate PDL (n=120)  | P value |
|----------------------------------------------|-----------------------|-----------------------|-----------------------|---------|
| Age (years)                                  | 70.1 ± 7.8            | 70.6 ± 7.3            | 70.9 ± 7.9            | 0.580   |
| Male                                         | 173 (53.6)            | 31 (46.3)             | 67 (55.8)             | 0.440   |
| Paroxysmal AF                                | 151 (46.7)            | 28 (41.8)             | 55 (45.8)             | 0.760   |
| Hypertension                                 | 242 (74.9)            | 54 (80.6)             | 91 (75.8)             | 0.614   |
| Diabetes                                     | 76 (23.5)             | 22 (32.8)             | 30 (25.0)             | 0.278   |
| Coronary artery disease                      | 147 (45.5)            | 30 (44.8)             | 54 (45.0)             | 0.991   |
| History of stroke/TIA                        | 80 (24.8)             | 12 (17.9)             | 30 (25.0)             | 0.464   |
| Heart Failure                                | 160 (49.5)            | 34 (50.7)             | 66 (55.0)             | 0.592   |
| CHA <sub>2</sub> DS <sub>2</sub> -VASc score | 3.7 ± 1.4             | 3.9 ± 1.5             | 3.9 ± 1.7             | 0.334   |
| HAS-BLED score                               | 2.1 ± 0.9             | 2.0 ± 0.9             | 1.9 ± 0.9             | 0.095   |
| NT-proBNP (pg/mL)                            | 523.4 [163.1, 1057.7] | 649.1 [195.7, 1241.3] | 653.7 [297.4, 1286.0] | 0.748   |
| LAD (mm)                                     | 42.7 ± 6.2            | 43.2 ± 6.2            | 42.1 ± 5.5            | 0.453   |
| LVEF (%)                                     | 62.2 ± 8.0            | 61.3 ± 8.1            | 62.8 ± 5.9            | 0.456   |
| Device size (mm)                             |                       |                       |                       |         |
| 21                                           | 30 (9.0)              | 3 (4.5)               | 12 (10.0)             |         |
| 24                                           | 63 (19.5)             | 10 (14.9)             | 33 (27.5)             |         |
| 27                                           | 90 (27.9)             | 20 (29.9)             | 30 (25.0)             | 0.136   |
| 30                                           | 77 (23.8)             | 14 (20.9)             | 29 (24.2)             |         |
| 33                                           | 63 (19.5)             | 20 (29.9)             | 16 (13.3)             |         |

Values are mean ± SD, median [25<sup>th</sup>, 75<sup>th</sup> quartile] or n (%).

\*No PDL group includes complete closure and LAA patency without visible PDL.

AF=atrial fibrillation; LAD=left atrial diameter; LVEF=left ventricular ejection fraction; PDL=peri-device leak; TIA=transient ischemic attack.

**Table S5. Relative risks of clinical endpoints for LAA patency without visible PDL.**

| Outcomes            | Complete closure<br>(n=271) | LAA patency without<br>visible PDL<br>(n=52) | HR (95% CI)       | P value |
|---------------------|-----------------------------|----------------------------------------------|-------------------|---------|
| Ischemic stroke/TIA | 5 (1.8)                     | 3 (5.8)                                      | 4.38 (1.17-16.34) | 0.028   |
| Major bleeding      | 2 (0.7)                     | 1 (1.9)                                      | 2.70 (0.25-29.83) | 0.417   |
| CV death            | 3 (1.1)                     | 0 (0.0)                                      | -                 | -       |
| All-cause death     | 3 (1.1)                     | 1 (1.9)                                      | 1.73 (0.18-16.60) | 0.637   |
| MAEs                | 9 (3.3)                     | 5 (9.6)                                      | 3.59 (1.28-10.09) | 0.015   |

Values are presented as n (%).

CI=confidence intervals; CV=cardiovascular; HR=hazard ratio; LAA=left atrial appendage; LAAC=left atrial appendage closure; MAEs=major adverse events; PDL=peri-device leak; TIA=transient ischemic attack.

Of note, the Bonferroni corrected critical p value was  $0.05/3 \approx 0.017$ .

**Table S6. Relative risks of clinical endpoints for LAA patency with visible PDL.**

| Outcomes            | Complete closure<br>(n=271) | LAA patency with<br>visible PDL<br>(n=196) | HR (95% CI)       | P value |
|---------------------|-----------------------------|--------------------------------------------|-------------------|---------|
| Ischemic stroke/TIA | 5 (1.8)                     | 12 (6.1)                                   | 3.66 (1.29-10.42) | 0.015   |
| Major bleeding      | 2 (0.7)                     | 3 (1.5)                                    | 2.38 (0.40-14.26) | 0.344   |
| CV death            | 3 (1.1)                     | 2 (1.0)                                    | 1.53 (0.31-7.57)  | 0.604   |
| All-cause death     | 3 (1.1)                     | 8 (4.1)                                    | 3.96 (1.05-14.94) | 0.042   |
| MAEs                | 9 (3.3)                     | 22 (11.2)                                  | 3.71 (1.71-8.07)  | 0.001   |

Values are presented as n (%).

CI=confidence intervals; CV=cardiovascular; HR=hazard ratio; LAA=left atrial appendage; MAEs=major adverse events; PDL=peri-device leak; TIA=transient ischemic attack.

Of note, the Bonferroni corrected critical p value was  $0.05/3 \approx 0.017$ .

**Table S7. Comparison of event risks between LAA patency with and without visible PDL.**

| Outcomes            | LAA patency with visible PDL (n=196) | LAA patency without visible PDL (n=52) | HR (95% CI)       | P value |
|---------------------|--------------------------------------|----------------------------------------|-------------------|---------|
| Ischemic stroke/TIA | 12 (6.1)                             | 3 (5.8)                                | 1.21 (0.39-3.74)  | 0.747   |
| Major bleeding      | 3 (1.5)                              | 1 (1.9)                                | 1.20 (0.12-11.51) | 0.876   |
| CV death            | 2 (1.0)                              | 0 (0.0)                                | -                 | -       |
| All-cause death     | 8 (4.1)                              | 1 (1.9)                                | 0.46 (0.06-3.66)  | 0.461   |
| MAEs                | 22 (11.2)                            | 5 (9.6)                                | 0.99 (0.40-2.44)  | 0.982   |

Values are presented as n (%).

CI=confidence intervals; CV=cardiovascular; HR=hazard ratio; LAA=left atrial appendage; MAEs=major adverse events; PDL=peri-device leak; TIA=transient ischemic attack.

Of note, the Bonferroni corrected critical p value was  $0.05/3 \approx 0.017$ .

**Table S8. Clinical outcomes of patients with different PDL severity.**

| No vs. Mild PDL     | No PDL (n=323) | Mild PDL (n=67) | HR (95% CI)       | P value |
|---------------------|----------------|-----------------|-------------------|---------|
| Ischemic stroke/TIA | 9 (2.8)        | 2 (3.0)         | 1.33 (0.29-6.19)  | 0.714   |
| Major bleeding      | 3 (0.9)        | 2 (3.0)         | 3.93 (0.65-23.54) | 0.135   |
| CV death            | 3 (0.9)        | 0 (0.0)         | -                 | -       |
| All-cause death     | 4 (1.2)        | 2 (3.0)         | 2.88 (0.53-15.73) | 0.223   |
| MAEs                | 15 (4.6)       | 6 (9.0)         | 2.37 (0.92-6.13)  | 0.074   |

  

| No vs. Moderate PDL | No PDL (n=323) | Moderate PDL (n=120) | HR (95% CI)       | P value |
|---------------------|----------------|----------------------|-------------------|---------|
| Ischemic stroke/TIA | 9 (2.8)        | 8 (6.7)              | 2.41 (0.93-6.26)  | 0.071   |
| Major bleeding      | 3 (0.9)        | 1 (0.8)              | 0.93 (0.10-8.97)  | 0.951   |
| CV death            | 3 (0.9)        | 2 (1.7)              | 1.86 (0.31-11.17) | 0.496   |
| All-cause death     | 4 (1.2)        | 5 (4.2)              | 3.39 (0.91-12.65) | 0.069   |
| MAEs                | 15 (4.6)       | 14 (11.7)            | 2.53 (1.22-5.25)  | 0.013   |

  

| No vs. Severe PDL   | No PDL (n=323) | Severe PDL (n=9) | HR (95% CI)         | P value |
|---------------------|----------------|------------------|---------------------|---------|
| Ischemic stroke/TIA | 9 (2.8)        | 2 (22.2)         | 10.97 (2.32-51.94)  | 0.003   |
| Major bleeding      | 3 (0.9)        | 0 (0.0)          | -                   | -       |
| CV death            | 3 (0.9)        | 1 (11.1)         | 14.78 (1.53-142.49) | 0.020   |
| All-cause death     | 4 (1.2)        | 1 (11.1)         | 10.69 (1.19-95.88)  | 0.034   |
| MAEs                | 15 (4.6)       | 2 (22.2)         | 6.23 (1.41-27.48)   | 0.016   |

  

| Mild vs. Moderate PDL | Mild PDL (n=67) | Moderate PDL (n=120) | HR (95% CI)      | P value |
|-----------------------|-----------------|----------------------|------------------|---------|
| Ischemic stroke/TIA   | 2 (3.0)         | 8 (6.7)              | 1.73 (0.37-8.19) | 0.490   |
| Major bleeding        | 2 (3.0)         | 1 (0.8)              | 0.23 (0.02-2.52) | 0.228   |
| CV death              | 0 (0.0)         | 2 (1.7)              | -                | -       |
| All-cause death       | 2 (3.0)         | 5 (4.2)              | 1.18 (0.23-6.11) | 0.842   |
| MAEs                  | 6 (9.0)         | 14 (11.7)            | 1.05 (0.40-2.74) | 0.924   |



| Mild vs. Severe PDL | Mild PDL (n=67) | Severe PDL (n=9) | HR (95% CI)       | P value |
|---------------------|-----------------|------------------|-------------------|---------|
| Ischemic stroke/TIA | 2 (3.0)         | 2 (22.2)         | 6.54 (0.90-47.38) | 0.063   |
| Major bleeding      | 2 (3.0)         | 0 (0.0)          | -                 | -       |
| CV death            | 0 (0.0)         | 1 (11.1)         | -                 | -       |
| All-cause death     | 2 (3.0)         | 1 (11.1)         | 3.82 (0.35-42.16) | 0.274   |
| MAEs                | 6 (9.0)         | 2 (22.2)         | 2.84 (0.55-14.81) | 0.215   |

| Moderate vs. Severe PDL | Moderate PDL (n=120) | Severe PDL (n=9) | HR (95% CI)       | P value |
|-------------------------|----------------------|------------------|-------------------|---------|
| Ischemic stroke/TIA     | 8 (6.7)              | 2 (22.2)         | 4.51 (0.93-21.81) | 0.061   |
| Major bleeding          | 1 (0.8)              | 0 (0.0)          | -                 | -       |
| CV death                | 2 (1.7)              | 1 (11.1)         | 8.03 (0.73-88.93) | 0.090   |
| All-cause death         | 5 (4.2)              | 1 (11.1)         | 3.05 (0.36-26.17) | 0.309   |
| MAEs                    | 14 (11.7)            | 2 (22.2)         | 2.43 (0.55-10.77) | 0.244   |

| No-to-Mild vs. Moderate PDL | No-to-Mild PDL (n=390) | Moderate PDL (n=120) | HR (95% CI)       | P value |
|-----------------------------|------------------------|----------------------|-------------------|---------|
| Ischemic stroke/TIA         | 11 (2.8)               | 8 (6.7)              | 2.30 (0.92-5.71)  | 0.074   |
| Major bleeding              | 5 (1.3)                | 1 (0.8)              | 0.67 (0.08-5.72)  | 0.713   |
| CV death                    | 3 (0.8)                | 2 (1.7)              | 2.18 (0.36-13.09) | 0.393   |
| All-cause death             | 6 (1.5)                | 5 (4.2)              | 2.60 (0.79-8.53)  | 0.116   |
| MAEs                        | 21 (5.4)               | 14 (11.7)            | 2.11 (1.07-4.15)  | 0.031   |

| No-to-Mild vs. Severe PDL | No-to-Mild PDL (n=390) | Severe PDL (n=9) | HR (95% CI)         | P value |
|---------------------------|------------------------|------------------|---------------------|---------|
| Ischemic stroke/TIA       | 11 (2.8)               | 2 (22.2)         | 9.78 (2.13-44.95)   | 0.003   |
| Major bleeding            | 5 (1.3)                | 0 (0.0)          | -                   | -       |
| CV death                  | 3 (0.8)                | 1 (11.1)         | 17.30 (1.79-166.80) | 0.014   |
| All-cause death           | 6 (1.5)                | 1 (11.1)         | 8.43 (1.01-70.13)   | 0.049   |
| MAEs                      | 21 (5.4)               | 2 (22.2)         | 5.26 (1.22-22.63)   | 0.026   |

Values are presented as n (%).

Of note, No PDL includes complete closure and LAA patency without visible PDL. Mild PDL indicates PDL >0-≤3mm; moderate PDL

indicates PDL  $>3\text{--}\leq 5\text{mm}$ ; severe PDL indicates PDL  $>5\text{mm}$ ; no-to-mild PDL indicates no PDL or PDL  $>0\text{--}\leq 3\text{mm}$ .

CI=confidence intervals; CV=cardiovascular; HR=hazard ratio; MAEs=major adverse events; PDL=peri-device leak; TIA=transient ischemic attack.

**Table S9. Recurrent risks of atrial tachyarrhythmias among patients with complete closure, LAA patency with and without visible PDL groups.**

| Recurrence of atrial tachyarrhythmias                            | HR (95% CI)      | P value |
|------------------------------------------------------------------|------------------|---------|
| Complete closure vs. LAA patency with visible PDL                | 1.30 (0.89-1.90) | 0.175   |
| Complete closure vs. LAA patency without visible PDL             | 0.88 (0.45-1.71) | 0.701   |
| LAA patency with visible PDL vs. LAA patency without visible PDL | 0.66 (0.33-1.30) | 0.224   |

CI=confidence intervals; HR=hazard ratio; LAA=left atrial appendage; PDL=peri-device leak.

**Table S10. Predictors of ischemic stroke or TIA in LAA patency with visible PDL.**

| Variables                             | Univariate       |         | Multivariable    |         |
|---------------------------------------|------------------|---------|------------------|---------|
|                                       | HR (95% CI)      | P value | HR (95% CI)      | P value |
| Age (years)                           | 1.13 (1.04-1.24) | 0.006   | 1.10 (1.01-1.21) | 0.032   |
| Male                                  | 1.69 (0.51-5.68) | 0.393   | 1.22 (0.33-4.49) | 0.769   |
| Paroxysmal AF                         | 0.39 (0.11-1.46) | 0.162   |                  |         |
| Hypertension                          | 0.61 (0.18-2.04) | 0.424   |                  |         |
| Diabetes                              | 1.00 (0.27-3.70) | 0.994   |                  |         |
| Coronary artery disease               | 0.58 (0.18-1.94) | 0.378   |                  |         |
| History of stroke/TIA                 | 2.15 (0.68-6.49) | 0.190   |                  |         |
| Heart failure                         | 1.29 (0.41-4.07) | 0.662   |                  |         |
| NT-proBNP (pg/mL)                     | 1.00 (1.00-1.00) | 0.129   |                  |         |
| LAD (mm)                              | 1.06 (0.95-1.17) | 0.287   |                  |         |
| LVEF (%)                              | 1.01 (0.92-1.11) | 0.866   |                  |         |
| Device size (mm)                      | 1.17 (0.99-1.40) | 0.073   | 1.10 (0.09-1.25) | 0.339   |
| Post-LAAC antiplatelet therapy        | 0.32 (0.10-0.99) | 0.049   | 0.27 (0.08-0.91) | 0.034   |
| Recurrence of atrial tachyarrhythmias | 2.40 (0.76-7.56) | 0.136   |                  |         |
| Width of PDL (mm)                     | 2.29 (1.56-3.38) | <0.001  | 1.94 (1.30-2.90) | 0.001   |

AF=atrial fibrillation; CI=confidence intervals; HR=hazard ratio; LAA=left atrial appendage; LAAC=left atrial appendage closure; LAD=left atrial diameter; LVEF=left ventricular ejection fraction; PDL=peri-device leak; TIA=transient ischemic attack.

**Table S11. Predictors of MAEs in LAA patency with visible PDL.**

| Variables                             | Univariate       |         | Multivariable    |         |
|---------------------------------------|------------------|---------|------------------|---------|
|                                       | HR (95% CI)      | P value | HR (95% CI)      | P value |
| Age (years)                           | 1.14 (1.07-1.22) | <0.001  | 1.12 (1.05-1.20) | 0.001   |
| Male                                  | 1.02 (0.44-2.37) | 0.973   | 0.73 (0.30-1.80) | 0.497   |
| Paroxysmal AF                         | 0.55 (0.22-1.35) | 0.190   |                  |         |
| Hypertension                          | 0.67 (0.27-1.63) | 0.374   |                  |         |
| Diabetes                              | 0.87 (0.32-2.35) | 0.776   |                  |         |
| Coronary artery disease               | 0.79 (0.34-1.86) | 0.591   |                  |         |
| History of stroke/TIA                 | 1.74 (0.73-4.14) | 0.214   |                  |         |
| Heart failure                         | 3.15 (1.16-8.54) | 0.024   | 2.53 (0.78-8.20) | 0.122   |
| NT-proBNP (pg/mL)                     | 1.00 (1.00-1.00) | 0.024   | 1.00 (1.00-1.00) | 0.716   |
| LAD (mm)                              | 1.02 (0.94-1.10) | 0.691   |                  |         |
| LVEF (%)                              | 1.02 (0.95-1.11) | 0.540   |                  |         |
| Device size (mm)                      | 1.04 (0.93-1.17) | 0.479   |                  |         |
| Post-LAAC antiplatelet therapy        | 0.26 (0.11-0.61) | 0.002   | 0.22 (0.08-0.55) | 0.001   |
| Recurrence of atrial tachyarrhythmias | 1.37 (0.57-3.31) | 0.486   |                  |         |
| Width of PDL (mm)                     | 1.87 (1.38-2.53) | <0.001  | 1.80 (1.34-2.41) | <0.001  |

AF=atrial fibrillation; CI=confidence intervals; HR=hazard ratio; LAA=left atrial appendage; LAAC=left atrial appendage closure; LAD=left atrial diameter; LVEF=left ventricular ejection fraction; MAEs=major adverse events; PDL=peri-device leak; TIA=transient ischemic attack.

**Table S12. Predictors of MAEs in LAA patency without visible PDL.**

| Variables                             | Univariate        |         | Multivariable    |         |
|---------------------------------------|-------------------|---------|------------------|---------|
|                                       | HR (95% CI)       | P value | HR (95% CI)      | P value |
| Age (years)                           | 1.09 (0.98-1.21)  | 0.135   | 1.08 (0.97-1.20) | 0.165   |
| Male                                  | 0.49 (0.09-2.70)  | 0.411   | 0.30 (0.04-2.24) | 0.240   |
| Paroxysmal AF                         | 0.63 (0.12-3.45)  | 0.593   |                  |         |
| Hypertension                          | 1.14 (0.13-9.84)  | 0.903   |                  |         |
| Diabetes                              | 0.44 (0.05-3.84)  | 0.458   |                  |         |
| Coronary artery disease               | 3.44 (0.40-29.66) | 0.261   |                  |         |
| History of stroke/TIA                 | 2.79 (0.53-14.60) | 0.225   |                  |         |
| Heart failure                         | 0.99 (0.19-5.08)  | 0.989   |                  |         |
| NT-proBNP (pg/mL)                     | 1.00 (1.00-1.00)  | 0.455   |                  |         |
| LAD (mm)                              | 0.99 (0.85-1.15)  | 0.875   |                  |         |
| LVEF (%)                              | 1.23 (0.99-1.54)  | 0.062   | 1.17 (0.96-1.44) | 0.128   |
| Device size (mm)                      | 0.90 (0.72-1.13)  | 0.347   |                  |         |
| Post-LAAC antiplatelet therapy        | 0.12 (0.02-0.72)  | 0.021   | 0.15 (0.02-1.30) | 0.085   |
| Recurrence of atrial tachyarrhythmias | 1.41 (0.25-8.08)  | 0.697   |                  |         |

AF=atrial fibrillation; CI=confidence intervals; HR=hazard ratio; LAA=left atrial appendage; LAAC=left atrial appendage closure; LAD=left atrial diameter; LVEF=left ventricular ejection fraction; MAEs=major adverse events; PDL=peri-device leak; TIA=transient ischemic attack.

**Table S13. Predictors of the presence of LAA patency with visible PDL.**

| Variables               | Univariate       |         | Multivariable    |         |
|-------------------------|------------------|---------|------------------|---------|
|                         | OR (95% CI)      | P value | OR (95% CI)      | P value |
| Age (years)             | 1.02 (1.00-1.04) | 0.115   | 1.02 (1.00-1.04) | 0.119   |
| Male                    | 0.94 (0.65-1.36) | 0.754   | 0.96 (0.67-1.39) | 0.841   |
| Paroxysmal AF           | 0.92 (0.64-1.33) | 0.652   |                  |         |
| Hypertension            | 1.23 (0.80-1.89) | 0.354   |                  |         |
| Diabetes                | 1.32 (0.86-2.00) | 0.203   |                  |         |
| Coronary artery disease | 1.05 (0.73-1.52) | 0.794   |                  |         |
| History of stroke/TIA   | 1.04 (0.68-1.61) | 0.854   |                  |         |
| Heart failure           | 1.09 (0.75-1.57) | 0.648   |                  |         |
| NT-proBNP (pg/mL)       | 1.00 (1.00-1.00) | 0.464   |                  |         |
| LAD (mm)                | 1.00 (0.97-1.03) | 0.924   |                  |         |
| LVEF (%)                | 1.00 (0.97-1.02) | 0.831   |                  |         |
| Device size (mm)        | 1.02 (0.97-1.07) | 0.568   |                  |         |

AF=atrial fibrillation; CI=confidence intervals; LAA=left atrial appendage; LAD=left atrial diameter; LVEF=left ventricular ejection fraction; OR=odds ratio; PDL=peri-device leak; TIA=transient ischemic attack.

**Table S14. Predictors of the presence of LAA patency without visible PDL.**

| Variables               | Univariate       |         | Multivariable    |         |
|-------------------------|------------------|---------|------------------|---------|
|                         | OR (95% CI)      | P value | OR (95% CI)      | P value |
| Age                     | 1.04 (1.00-1.08) | 0.070   | 1.03 (0.99-1.07) | 0.127   |
| Male                    | 1.01 (0.56-1.84) | 0.964   | 1.02 (0.55-1.87) | 0.954   |
| Paroxysmal AF           | 1.07 (0.59-1.93) | 0.834   |                  |         |
| Hypertension            | 1.49 (0.71-3.13) | 0.291   |                  |         |
| Diabetes                | 1.24 (0.63-2.44) | 0.529   |                  |         |
| Coronary artery disease | 1.80 (0.99-3.27) | 0.056   | 1.66 (0.90-3.07) | 0.106   |
| History of stroke/TIA   | 1.60 (0.84-3.05) | 0.151   |                  |         |
| Heart failure           | 0.71 (0.39-1.29) | 0.257   |                  |         |
| NT-proBNP (pg/mL)       | 1.00 (1.00-1.00) | 0.837   |                  |         |
| LAD (mm)                | 1.03 (0.98-1.08) | 0.249   |                  |         |
| LVEF (%)                | 0.98 (0.95-1.02) | 0.289   |                  |         |
| Device size (mm)        | 1.07 (0.99-1.16) | 0.109   |                  |         |

AF=atrial fibrillation; CI=confidence intervals; LAA=left atrial appendage; LAD=left atrial diameter; LVEF=left ventricular ejection fraction; OR=odds ratio; PDL=peri-device leak; TIA=transient ischemic attack.
